# Supplementary material for: Roles of Exogenous α-Lipoic Acid and Cysteine in Mitigation of Drought Stress and Restoration of Grain Quality in Wheat
Source: MDPI journal article supplement (doi:10.3390/plants10112318), 2021-10-28
Supplement: s1 [file s1]

Table S1: Germination assay of Wheat seed after soaking with different concentration of  $\alpha$ -lipoic acid

| ALA                                        | Time                 |                     |                      |
|--------------------------------------------|----------------------|---------------------|----------------------|
|                                            | 2 h                  | 4h                  | 8 h                  |
| Fresh weight (mg. seedling <sup>-1</sup> ) |                      |                     |                      |
| <b>Control</b>                             | 52.08 $\pm$ 0.28 de  | 54.48 $\pm$ 0.71 cd | 54.23 $\pm$ 0.66 cd  |
| <b>1 <math>\mu</math>M</b>                 | 54.51 $\pm$ 0.40 cd  | 55.02 $\pm$ 0.95 cd | 47.93 $\pm$ 0.08 f   |
| <b>5 <math>\mu</math>M</b>                 | 55.65 $\pm$ 1.48 cd  | 56.54 $\pm$ 0.42 bc | 48.04 $\pm$ 0.09 f   |
| <b>10 <math>\mu</math>M</b>                | 54.77 $\pm$ 0.69 cd  | 59.86 $\pm$ 0.79 b  | 46.13 $\pm$ 0.56 fgh |
| <b>20 <math>\mu</math>M</b>                | 55.87 $\pm$ 1.39 cd  | 66.49 $\pm$ 1.19 a  | 42.41 $\pm$ 1.29 hi  |
| <b>50 <math>\mu</math>M</b>                | 49.80 $\pm$ 1.03 ef  | 46.59 $\pm$ 1.74 fg | 37.30 $\pm$ 0.64 j   |
| <b>100 <math>\mu</math>M</b>               | 43.89 $\pm$ 0.84 ghi | 41.31 $\pm$ 0.48 i  | 34.31 $\pm$ 1.60 j   |
| Antioxidant capacity by DPPH assay (%)     |                      |                     |                      |
| <b>Control</b>                             | 66.78 $\pm$ 0.71 fg  | 73.47 $\pm$ 0.79 d  | 67.97 $\pm$ 0.11 ef  |
| <b>1 <math>\mu</math>M</b>                 | 68.51 $\pm$ 0.36 ef  | 74.53 $\pm$ 2.03 cd | 62.26 $\pm$ 0.67 hi  |
| <b>5 <math>\mu</math>M</b>                 | 67.93 $\pm$ 0.47 ef  | 77.38 $\pm$ 0.80 bc | 58.62 $\pm$ 0.52 ijk |
| <b>10 <math>\mu</math>M</b>                | 68.14 $\pm$ 0.82 ef  | 79.50 $\pm$ 0.87 b  | 56.37 $\pm$ 1.08 jk  |
| <b>20 <math>\mu</math>M</b>                | 71.62 $\pm$ 1.61 de  | 86.99 $\pm$ 1.44 a  | 55.93 $\pm$ 0.90 jk  |
| <b>50 <math>\mu</math>M</b>                | 63.64 $\pm$ 0.76 gh  | 58.80 $\pm$ 0.92 ij | 45.80 $\pm$ 1.32 m   |
| <b>100 <math>\mu</math>M</b>               | 54.68 $\pm$ 1.13 kl  | 51.05 $\pm$ 0.34 l  | 40.88 $\pm$ 0.62 n   |
